# Supplementary material for: Novel reassortants of clade 2.3.4.4 H5N6 highly pathogenic avian influenza viruses possessing genetic heterogeneity in South Korea in late 2017
Source: PubMed Central journal article supplement — J Vet Sci. 2018 Nov 28;19(6):850–4. doi: 10.4142/jvs.2018.19.6.850 (PMC6265581; doi:10.4142/jvs.2018.19.6.850), 2018-11-28
Supplement: jvs-19-850-s001.pdf [file jvs-19-850-s001.pdf]

**Supplementary Table 1.** Accession numbers in the Global Initiative on Sharing All Influenza Data (GISAID) EpiFlu database used for phylogenetic analysis in this study

| Virus name                                               | Genotype | Collection date | GISAID PB2 accession No. | GISAID PB1 accession No. | GISAID PA accession No. | GISAID HA accession No. | GISAID NP accession No. | GISAID NA accession No. | GISAID MP accession No. | GISAID NS accession No. | GISAID originating laboratory (where given)                                                   | GISAID submitting laboratory                                 |
|----------------------------------------------------------|----------|-----------------|--------------------------|--------------------------|-------------------------|-------------------------|-------------------------|-------------------------|-------------------------|-------------------------|-----------------------------------------------------------------------------------------------|--------------------------------------------------------------|
| A/domestic_duck/Siberia/103/2016(H5N8)                   | B1.1     | 2016-10-04      | EPI926610                | EPI926611                | EPI926612               | EPI926613               | EPI926614               | EPI926615               | EPI926616               | EPI926617               | Research Institute of Experimental and Clinical Medicine                                      | Research Institute of Experimental and Clinical Medicine     |
| A/Bar-headed_Goose/Qinghai/BTY17-LU/2016(H5N8)           | B1       | 2016-05-15      | EPI774110                | EPI774111                | EPI774112               | EPI774113               | EPI774114               | EPI774115               | EPI774116               | EPI774117               | State Key Laboratory of Virology and Wuhan Institute of Virology, Chinese Academy of Sciences | Wuhan Institute of Virology                                  |
| A/Bar-headed_Goose/Qinghai/BTY1-B/2016(H5N8)             | B1       | 2016-05-09      | EPI774391                | EPI774392                | EPI774393               | EPI774394               | EPI774395               | EPI774396               | EPI774397               | EPI774398               | State Key Laboratory of Virology and Wuhan Institute of Virology, Chinese Academy of Sciences | Wuhan Institute of Virology                                  |
| A/Bk_swan/NL-Den_Oever/16013973-002/2016(H5N8)           | B3.2     | 2016-11-10      | EPI1019363               | EPI1019364               | EPI1019362              | EPI1019366              | EPI1019359              | EPI1019365              | EPI1019361              | EPI1019360              | Wageningen Bioveterinary Research                                                             | Wageningen Bioveterinary Research                            |
| A/Bl_H_gull/NL-Slootdorp/16014102-002/2016(H5N8)         | B3.2     | 2016-11-11      | EPI1019371               | EPI1019372               | EPI1019370              | EPI1019374              | EPI1019367              | EPI1019373              | EPI1019369              | EPI1019368              | Wageningen Bioveterinary Research                                                             | Wageningen Bioveterinary Research                            |
| A/black_swan/Germany-BW/R1364/2017(H5N8)                 | B2       | 2017-02-12      | EPI1087661               | EPI995484                | EPI1002887              | EPI988345               | EPI1002885              | EPI990101               | EPI1002886              | EPI1002888              |                                                                                               | Friedrich-Loeffler-Institut                                  |
| A/black-headed_gull/Tyva/41/2016(H5N8)                   | B1       | 2016-05-25      | EPI823753                | EPI823754                | EPI823755               | EPI823756               | EPI823757               | EPI823758               | EPI823759               | EPI823760               | State Research Center of Virology and Biotechnology (VECTOR)                                  | WHO National Influenza Centre Russian Federation             |
| A/Buzzard/NL-Durgedam/16015100-004/2016(H5N8)            | B3.3     | 2016-11-30      | EPI1019379               | EPI1019380               | EPI1019378              | EPI1019382              | EPI1019375              | EPI1019381              | EPI1019377              | EPI1019376              | Wageningen Bioveterinary Research                                                             | Wageningen Bioveterinary Research                            |
| A/C_Gull/NL-Slootdorp/16014102-003/2016(H5N8)            | B3.2     | 2016-11-11      | EPI1019387               | EPI1019388               | EPI1019386              | EPI1019390              | EPI1019383              | EPI1019389              | EPI1019385              | EPI1019384              | Wageningen Bioveterinary Research                                                             | Wageningen Bioveterinary Research                            |
| A/Ch/NL-Abbega/X16015736/2016(H5N8)                      | B3.2     | 2016-12-12      | EPI1019395               | EPI1019396               | EPI1019394              | EPI1019398              | EPI1019391              | EPI1019397              | EPI1019393              | EPI1019392              | Wageningen Bioveterinary Research                                                             | Wageningen Bioveterinary Research                            |
| A/Ch/NL-Boven_Neewen/16016151-006-010/2016(H5N8)         | B3.1     | 2016-12-19      | EPI1019403               | EPI1019404               | EPI1019402              | EPI1019406              | EPI1019399              | EPI1019405              | EPI1019401              | EPI1019400              | Wageningen Bioveterinary Research                                                             | Wageningen Bioveterinary Research                            |
| A/Ch/NL-Den_Oever/16014231-001/2016(H5N8)                | B3.2     | 2016-11-15      | EPI1019411               | EPI1019412               | EPI1019410              | EPI1019414              | EPI1019407              | EPI1019413              | EPI1019409              | EPI1019408              | Wageningen Bioveterinary Research                                                             | Wageningen Bioveterinary Research                            |
| A/Ch/NL-Hiaure/16016112-001-005/2016(H5N8)               | B3.2     | 2016-12-17      | EPI1019419               | EPI1019420               | EPI1019418              | EPI1019422              | EPI1019415              | EPI1019421              | EPI1019417              | EPI1019416              | Wageningen Bioveterinary Research                                                             | Wageningen Bioveterinary Research                            |
| A/Ch/NL-Rhenen/16016141-006/2016(H5N8)                   | B3.1     | 2016-12-17      | EPI1019427               | EPI1019428               | EPI1019426              | EPI1019430              | EPI1019423              | EPI1019429              | EPI1019425              | EPI1019424              | Wageningen Bioveterinary Research                                                             | Wageningen Bioveterinary Research                            |
| A/Ch/NL-Zoeterwoude/16016484-021-025/2016(H5N8)          | B3.1     | 2016-12-24      | EPI1019435               | EPI1019436               | EPI1019434              | EPI1019438              | EPI1019431              | EPI1019437              | EPI1019433              | EPI1019432              | Wageningen Bioveterinary Research                                                             | Wageningen Bioveterinary Research                            |
| A/chicken/Astrakhan/3131/2016(H5N8)                      | B3.2     | 2016-12-13      | EPI909465                | EPI909466                | EPI909467               | EPI869938               | EPI909468               | EPI869939               | EPI909469               | EPI909470               |                                                                                               | State Research Center of Virology and Biotechnology (VECTOR) |
| A/chicken/Belgium/807/2017(H5N8)                         | B3.2     | 2017-02-01      | EPI1007664               | EPI1007665               | EPI1007666              | EPI1007667              | EPI1007668              | EPI1007669              | EPI1007670              | EPI1007671              |                                                                                               | Other Database Import                                        |
| A/chicken/Czech_Republi/206-17_2/2017(H5N8)              | B2.1     | 2017-01-06      | EPI964914                | EPI964915                | EPI964916               | EPI964917               | EPI964918               | EPI964919               | EPI964920               | EPI964921               |                                                                                               | Other Database Import                                        |
| A/chicken/Czech_Republi/988-17/2017(H5N8)                | B2       | 2017-01-20      | EPI1087632               | EPI1087634               | EPI1087635              | EPI1087636              | EPI1087639              | EPI1087638              | EPI1087641              | EPI1087642              | State Veterinary Institute Prague                                                             | State Veterinary Institute Prague                            |
| A/chicken/Germany-MVR/10048/2016(H5N8)                   | B3.2     | 2016-11-27      | EPI932937                | EPI931205                | EPI931206               | EPI932938               | EPI926626               | EPI956134               | EPI922507               | EPI956133               |                                                                                               | Friedrich-Loeffler-Institut                                  |
| A/chicken/Germany-NI/R11406/2016(H5N8)                   | B3.2     | 2016-12-24      | EPI926625                | EPI956130                | EPI959127               | EPI922508               | EPI933139               | EPI956129               | EPI956132               | EPI956131               |                                                                                               | Friedrich-Loeffler-Institut                                  |
| A/chicken/Italy/17VIR1684-2/2017(H5N8)                   | B2       | 2017-02-27      | EPI961514                | EPI961515                | EPI961513               | EPI961517               | EPI961510               | EPI961516               | EPI961512               | EPI961511               | Istituto Zooprofilattico Sperimentale Delle Venezie                                           | Istituto Zooprofilattico Sperimentale Delle Venezie          |
| A/chicken/Italy/17VIR3078/2017(H5N8)                     | B3.2     | 2017-04-07      | EPI1040238               | EPI1040237               | EPI1040236              | EPI1040223              | EPI1040234              | EPI1040224              | EPI1040233              | EPI1040235              | Istituto Zooprofilattico Sperimentale Delle Venezie                                           | Istituto Zooprofilattico Sperimentale Delle Venezie          |
| A/chicken/Italy/17VIR653-12/2017(H5N8)                   | B3.1     | 2017-01-25      | EPI954580                | EPI954581                | EPI954579               | EPI954583               | EPI954576               | EPI954582               | EPI954578               | EPI954577               | Istituto Zooprofilattico Sperimentale Delle Venezie                                           | Istituto Zooprofilattico Sperimentale Delle Venezie          |
| A/chicken/Kalmykia/2643/2016(H5N8)                       | B3.2     | 2016-11-21      | EPI909457                | EPI909458                | EPI909459               | EPI909460               | EPI909461               | EPI909462               | EPI909463               | EPI909464               |                                                                                               | State Research Center of Virology and Biotechnology (VECTOR) |
| A/chicken/Korea/Gimje2/2017(H5N8)                        | B1.1     | 2017-02-06      | EPI1123348               | EPI1123349               | EPI1123350              | EPI1123351              | EPI1123352              | EPI1123353              | EPI1123354              | EPI1123355              | Avian Influenza Research and Diagnostic Division, Animal and Plant Quarantine Agency          | Animal and Plant Quarantine Agency (QIA)                     |
| A/chicken/Korea/Gunshan/2017(H5N8)                       | B1.1     | 2017-06-03      | EPI1123340               | EPI1123341               | EPI1123342              | EPI1123343              | EPI1123344              | EPI1123345              | EPI1123346              | EPI1123347              | Avian Influenza Research and Diagnostic Division, Animal and Plant Quarantine Agency          | Animal and Plant Quarantine Agency (QIA)                     |
| A/chicken/Republic_of_Macedonia/AR1167-102131/2017(H5N8) | B2       | 2017-01-21      | EPI987879                | EPI987880                | EPI987881               | EPI987882               | EPI987883               | EPI987884               | EPI987885               | EPI987886               | University "Ss. Cyril and Methodius", Veterinary Institute, Department of Avian diseases      | Friedrich-Loeffler-Institut                                  |
| A/chicken/Rostov/44/2017(H5N8)                           | B3.2     | 2017-04-18      | EPI1045606               | EPI1045607               | EPI1045608              | EPI1045611              | EPI1045609              | EPI1045610              | EPI1045612              | EPI1045613              |                                                                                               | State Research Center of Virology and Biotechnology (VECTOR) |

Supplementary Table 1. Continued

| Virus name                                                 | Genotype | Collection date | GISAID PB2 accession No. | GISAID PB1 accession No. | GISAID PA accession No. | GISAID HA accession No. | GISAID NP accession No. | GISAID NA accession No. | GISAID MP accession No. | GISAID NS accession No. | GISAID originating laboratory (where given)                                                          | GISAID submitting laboratory                                  |
|------------------------------------------------------------|----------|-----------------|--------------------------|--------------------------|-------------------------|-------------------------|-------------------------|-------------------------|-------------------------|-------------------------|------------------------------------------------------------------------------------------------------|---------------------------------------------------------------|
| A/chicken/Sergiyev Posad/38/2017(H5N8)                     | B3.2     | 2017-03-02      | EPI961455                | EPI961456                | EPI961458               | EPI961459               | EPI961460               | EPI961461               | EPI961462               | EPI961463               |                                                                                                      | State Research Center of Virology and Biotechnology (VECTOR)  |
| A/chicken/Shchyolkovo/47/2017(H5N8)                        | B3.2     | 2017-03-05      | EPI1045592               | EPI1045593               | EPI1045594              | EPI1045597              | EPI1045595              | EPI1045596              | EPI1045598              | EPI1045599              |                                                                                                      | State Research Center of Virology and Biotechnology (VECTOR)  |
| A/chicken/Tatarstan/88/2017(H5N8)                          | B3.2     | 2017-05-08      | EPI1045614               | EPI1045615               | EPI1045616              | EPI1045619              | EPI1045617              | EPI1045618              | EPI1045620              | EPI1045621              |                                                                                                      | State Research Center of Virology and Biotechnology (VECTOR)  |
| A/chicken/Voronezh/19/2017(H5N8)                           | B3.2     | 2017-01-06      | EPI909409                | EPI909410                | EPI909411               | EPI909412               | EPI909413               | EPI909414               | EPI909415               | EPI909416               |                                                                                                      | State Research Center of Virology and Biotechnology (VECTOR)  |
| A/chicken/Wales/23/2016(H5N8)                              | B3.1     | 2016-12-31      | EPI942940                | EPI942941                | EPI942942               | EPI942943               | EPI942944               | EPI942945               | EPI942946               | EPI942947               | Animal and Plant Health Agency (APHA)                                                                | Animal and Plant Health Agency (APHA)                         |
| A/Common buzzard/Hungary/7061/2017(H5N8)                   | B2       | 2017-02-21      | EPI954772                | EPI954773                | EPI954771               | EPI954775               | EPI954768               | EPI954774               | EPI954770               | EPI954769               | Central Agricultural Office Veterinary Diagnostic Directorate                                        | Central Agricultural Office Veterinary Diagnostic Directorate |
| A/Common teal/Korea/W547/2016(H5N8)                        | B1.1     | 2016-12-15      | EPI1006731               | EPI1006726               | EPI1006721              | EPI1006680              | EPI1006713              | EPI1006711              | EPI1006706              | EPI1006717              |                                                                                                      | Other Database Import                                         |
| A/Common teal/Korea/W553/2017(H5N8)                        | B1.1     | 2017-01-04      | EPI1006735               | EPI1006730               | EPI1006725              | EPI1006705              | EPI1006716              | EPI1006712              | EPI1006710              | EPI1006686              |                                                                                                      | Other Database Import                                         |
| A/Common tern/Hungary/8187/2017(H5N8)                      | B3.2     | 2017-02-28      | EPI954780                | EPI954781                | EPI954779               | EPI954783               | EPI954776               | EPI954782               | EPI954778               | EPI954777               | Central Agricultural Office Veterinary Diagnostic Directorate                                        | Central Agricultural Office Veterinary Diagnostic Directorate |
| A/Cormorant/Hungary/6102/2017(H5N8)                        | B2       | 2017-02-15      | EPI959520                | EPI959521                | EPI959519               | EPI959523               | EPI959516               | EPI959522               | EPI959518               | EPI959517               | National Food Chain Safety Office Veterinary Diagnostic Directorate Laboratory for Molecular Biology | Central Agricultural Office Veterinary Diagnostic Directorate |
| A/Crow/NL-Oostwoud/16015372-004/2016(H5N8)                 | B3.3     | 2016-12-05      | EPI1019443               | EPI1019444               | EPI1019442              | EPI1019446              | EPI1019439              | EPI1019445              | EPI1019441              | EPI1019440              | Wageningen Bioveterinary Research                                                                    | Wageningen Bioveterinary Research                             |
| A/Cygnus olor/Belgium/1567/2017(H5N8)                      | B2       | 2017-02-21      | EPI1007680               | EPI1007681               | EPI1007682              | EPI1007683              | EPI1007684              | EPI1007685              | EPI1007686              | EPI1007687              |                                                                                                      | Other Database Import                                         |
| A/Dk/NL-Biddinghuizen/16014829-011-015/2016(H5N8)          | B3.2     | 2016-11-25      | EPI1019451               | EPI1019452               | EPI1019450              | EPI1019454              | EPI1019447              | EPI1019453              | EPI1019449              | EPI1019448              | Wageningen Bioveterinary Research                                                                    | Wageningen Bioveterinary Research                             |
| A/Dk/NL-Kamperveen/16016104-001-005/2016(H5N8)             | B3.1     | 2016-12-15      | EPI1019475               | EPI1019476               | EPI1019474              | EPI1019478              | EPI1019471              | EPI1019477              | EPI1019473              | EPI1019472              | Wageningen Bioveterinary Research                                                                    | Wageningen Bioveterinary Research                             |
| A/Dk/NL-Rotterdam/16014008-001-005/2016(H5N8)              | B3.2     | 2016-11-10      | EPI1019483               | EPI1019484               | EPI1019482              | EPI1019486              | EPI1019479              | EPI1019485              | EPI1019481              | EPI1019480              | Wageningen Bioveterinary Research                                                                    | Wageningen Bioveterinary Research                             |
| A/Dk/NL-Stolwijk/16016291-016-020/2016(H5N8)               | B3.1     | 2016-12-21      | EPI1019491               | EPI1019492               | EPI1019490              | EPI1019494              | EPI1019487              | EPI1019493              | EPI1019489              | EPI1019488              | Wageningen Bioveterinary Research                                                                    | Wageningen Bioveterinary Research                             |
| A/domestic duck/Germany-MV/R9764/2016(H5N8)                | B3.2     | 2016-11-21      | EPI967463                | EPI967462                | EPI967670               | EPI963516               | EPI988588               | EPI967672               | EPI963517               | EPI967671               |                                                                                                      | Friedrich-Loeffler-Institut                                   |
| A/domestic duck/Germany-MV/R9869/2016(H5N8)                | B3.2     | 2016-11-23      | EPI895486                | EPI885204                | EPI877540               | EPI881292               | EPI888670               | EPI877536               | EPI877537               | EPI877539               |                                                                                                      | Friedrich-Loeffler-Institut                                   |
| A/duck/France/1611108h/2016(H5N8)                          | B2       | 2016-11-28      | EPI869806                | EPI869807                | EPI869808               | EPI869809               | EPI869810               | EPI869811               | EPI869812               | EPI869813               |                                                                                                      | French Agency for Food, Environmental and Occupational Health |
| A/Duck/Hungary/54738/2016(H5N8)                            | B2       | 2016-11-09      | EPI962041                | EPI962042                | EPI962040               | EPI962046               | EPI962036               | EPI962044               | EPI962039               | EPI962038               | National Food Chain Safety Office Veterinary Diagnostic Directorate Laboratory for Molecular Biology | Central Agricultural Office Veterinary Diagnostic Directorate |
| A/duck/Hungary/55191/2016(H5N8)                            | B2       | 2016-11-11      | EPI860528                | EPI860527                | EPI860529               | EPI860534               | EPI860530               | EPI860531               | EPI860532               | EPI860533               | National Food Chain Safety Office Veterinary Diagnostic Directorate Laboratory for Molecular Biology | Central Agricultural Office Veterinary Diagnostic Directorate |
| A/Duck/Hungary/984/2017(H5N8)                              | B2       | 2017-01-11      | EPI954652                | EPI954653                | EPI954651               | EPI954655               | EPI954648               | EPI954654               | EPI954650               | EPI954649               | Central Agricultural Office Veterinary Diagnostic Directorate                                        | Central Agricultural Office Veterinary Diagnostic Directorate |
| A/duck/India/10CA/01/2016(H5N8)                            | B1       | 2016-10-17      | EPI858833                | EPI858834                | EPI858835               | EPI858836               | EPI858837               | EPI858838               | EPI858840               | EPI858839               | ICAR-National Institute of High Security Animal Diseases                                             | ICAR-National Institute of High Security Animal Diseases      |
| A/duck/Korea/H35/2017(H5N6)                                | B3.1.1   | 2017-12-10      | EPI1145157               | EPI1145158               | EPI1145161              | EPI1145162              | EPI1145163              | EPI1145164              | EPI1145165              | EPI1145166              | Avian Influenza Research and Diagnostic Division, Animal and Plant Quarantine Agency                 | Animal and Plant Quarantine Agency (QIA)                      |
| A/duck/Korea/HD1/2017(H5N6)                                | B3.2.1   | 2017-11-27      | EPI1123314               | EPI1123315               | EPI1123316              | EPI1123317              | EPI1123318              | EPI1123319              | EPI1123320              | EPI1123321              | Avian Influenza Research and Diagnostic Division, Animal and Plant Quarantine Agency                 | Animal and Plant Quarantine Agency (QIA)                      |
| A/Eur_Wig/NL-Akkrum/16015817-003/2016(H5N8)                | B3.2     | 2016-12-13      | EPI1019499               | EPI1019500               | EPI1019498              | EPI1019502              | EPI1019495              | EPI1019501              | EPI1019497              | EPI1019496              | Wageningen Bioveterinary Research                                                                    | Wageningen Bioveterinary Research                             |
| A/Eur_Wig/NL-De Waa1 (Texel)/16014891-003/2016(H5N8)       | B3.1     | 2016-11-27      | EPI1019507               | EPI1019508               | EPI1019506              | EPI1019510              | EPI1019503              | EPI1019509              | EPI1019505              | EPI1019504              | Wageningen Bioveterinary Research                                                                    | Wageningen Bioveterinary Research                             |
| A/Eur_Wig/NL-Drieborg (Dollard)/16015513-001/2016(H5N8)    | B3.2     | 2016-12-06      | EPI1019523               | EPI1019524               | EPI1019522              | EPI1019526              | EPI1019519              | EPI1019525              | EPI1019521              | EPI1019520              | Wageningen Bioveterinary Research                                                                    | Wageningen Bioveterinary Research                             |
| A/Eur_Wig/NL-Ennumatil (Groningen)/16015704-001/2016(H5N8) | B3.2     | 2016-12-11      | EPI1019531               | EPI1019532               | EPI1019530              | EPI1019534              | EPI1019527              | EPI1019533              | EPI1019529              | EPI1019528              | Wageningen Bioveterinary Research                                                                    | Wageningen Bioveterinary Research                             |
| A/Eur_Wig/NL-Ferwert/16015273-002/2016(H5N8)               | B3.2     | 2016-12-01      | EPI1019539               | EPI1019540               | EPI1019538              | EPI1019542              | EPI1019535              | EPI1019541              | EPI1019537              | EPI1019536              | Wageningen Bioveterinary Research                                                                    | Wageningen Bioveterinary Research                             |
| A/Eur_Wig/NL-Gouda/16015824-001/2016(H5N8)                 | B3.1     | 2016-12-13      | EPI1019547               | EPI1019548               | EPI1019546              | EPI1019550              | EPI1019543              | EPI1019549              | EPI1019545              | EPI1019544              | Wageningen Bioveterinary Research                                                                    | Wageningen Bioveterinary Research                             |

Supplementary Table 1. Continued

| Virus name                                                          | Genotype | Collection date | GISAI D PB2 accession No. | GISAI D PB1 accession No. | GISAI D PA accession No. | GISAI D HA accession No. | GISAI D NP accession No. | GISAI D NA accession No. | GISAI D MP accession No. | GISAI D NS accession No. | GISAI D originating laboratory (where given)                                                                     | GISAI D submitting laboratory                                         |
|---------------------------------------------------------------------|----------|-----------------|---------------------------|---------------------------|--------------------------|--------------------------|--------------------------|--------------------------|--------------------------|--------------------------|------------------------------------------------------------------------------------------------------------------|-----------------------------------------------------------------------|
| A/Eur_Wig/NL-Greonte<br>rp/16015653-001/20<br>16(H5N8)              | B3.2     | 2016-12-08      | EPI1019555                | EPI1019556                | EPI1019554               | EPI1019558               | EPI1019551               | EPI1019557               | EPI1019553               | EPI1019552               | Wageningen<br>Bioveterinary Research                                                                             | Wageningen<br>Bioveterinary<br>Research                               |
| A/Eur_Wig/NL-Groning<br>en/16015376-003/20<br>16(H5N8)              | B3.3     | 2016-12-05      | EPI1019563                | EPI1019564                | EPI1019562               | EPI1019566               | EPI1019559               | EPI1019565               | EPI1019561               | EPI1019560               | Wageningen<br>Bioveterinary Research                                                                             | Wageningen<br>Bioveterinary<br>Research                               |
| A/Eur_Wig/NL-Leeuwar<br>den/16015699-002/2<br>016(H5N8)             | B3.2     | 2016-12-10      | EPI1019571                | EPI1019572                | EPI1019570               | EPI1019574               | EPI1019567               | EPI1019573               | EPI1019569               | EPI1019568               | Wageningen<br>Bioveterinary Research                                                                             | Wageningen<br>Bioveterinary<br>Research                               |
| A/Eur_Wig/NL-Leidsche<br>ndam/16015697-007<br>/2016(H5N8)           | B3.1     | 2016-12-10      | EPI1019579                | EPI1019580                | EPI1019578               | EPI1019582               | EPI1019575               | EPI1019581               | EPI1019577               | EPI1019576               | Wageningen<br>Bioveterinary Research                                                                             | Wageningen<br>Bioveterinary<br>Research                               |
| A/Eur_Wig/NL-Reeuwij<br>k/16015903-003/201<br>6(H5N8)               | B3.1     | 2016-12-13      | EPI1019587                | EPI1019588                | EPI1019586               | EPI1019590               | EPI1019583               | EPI1019589               | EPI1019585               | EPI1019584               | Wageningen<br>Bioveterinary Research                                                                             | Wageningen<br>Bioveterinary<br>Research                               |
| A/Eur_Wig/NL-Terschel<br>ling/16015692-010/2<br>016(H5N8)           | B3.2     | 2016-12-09      | EPI1019595                | EPI1019596                | EPI1019594               | EPI1019598               | EPI1019591               | EPI1019597               | EPI1019593               | EPI1019592               | Wageningen<br>Bioveterinary Research                                                                             | Wageningen<br>Bioveterinary<br>Research                               |
| A/Eur_Wig/NL-Vianen/<br>16015917-006/2016(<br>H5N8)                 | B3.1     | 2016-12-13      | EPI1019603                | EPI1019604                | EPI1019602               | EPI1019606               | EPI1019599               | EPI1019605               | EPI1019601               | EPI1019600               | Wageningen<br>Bioveterinary Research                                                                             | Wageningen<br>Bioveterinary<br>Research                               |
| A/Eur_Wig/NL-Walters<br>wald/16015923-003/<br>2016(H5N8)            | B3.2     | 2016-12-14      | EPI1019611                | EPI1019612                | EPI1019610               | EPI1019614               | EPI1019607               | EPI1019613               | EPI1019609               | EPI1019608               | Wageningen<br>Bioveterinary Research                                                                             | Wageningen<br>Bioveterinary<br>Research                               |
| A/Eur_Wig/NL-West_Gr<br>atdijk/16015746-00<br>3/2016(H5N8)          | B3.1     | 2016-12-12      | EPI1019619                | EPI1019620                | EPI1019618               | EPI1019622               | EPI1019615               | EPI1019621               | EPI1019617               | EPI1019616               | Wageningen<br>Bioveterinary Research                                                                             | Wageningen<br>Bioveterinary<br>Research                               |
| A/Eur_Wig/NL-Wormer<br>/16016143-002/2016<br>(H5N8)                 | B3.2     | 2016-12-18      | EPI1019627                | EPI1019628                | EPI1019626               | EPI1019630               | EPI1019623               | EPI1019629               | EPI1019625               | EPI1019624               | Wageningen<br>Bioveterinary Research                                                                             | Wageningen<br>Bioveterinary<br>Research                               |
| A/Eur_Wig/NL-Zoeterv<br>oude/16015702-010/<br>2016(H5N8)            | B3.1     | 2016-12-10      | EPI1019635                | EPI1019636                | EPI1019634               | EPI1019638               | EPI1019631               | EPI1019637               | EPI1019633               | EPI1019632               | Wageningen<br>Bioveterinary Research                                                                             | Wageningen<br>Bioveterinary<br>Research                               |
| A/Eur_Wig/NL-Zwolle/<br>16015820-002/2016(<br>H5N8)                 | B3.1     | 2016-12-13      | EPI1019643                | EPI1019644                | EPI1019642               | EPI1019646               | EPI1019639               | EPI1019645               | EPI1019641               | EPI1019640               | Wageningen<br>Bioveterinary Research                                                                             | Wageningen<br>Bioveterinary<br>Research                               |
| A/Eurasian_wigon/Ger<br>many-N/AR249-L02<br>143/2017(H5N8)          | B3.1     | 2017-01-04      | EPI990767                 | EPI990768                 | EPI990766                | EPI990770                | EPI990763                | EPI990769                | EPI990765                | EPI990764                |                                                                                                                  | Friedrich-Loeffler-Institut                                           |
| A/G_c_grebe/NL-Monni<br>ckendam/16013865-<br>009-010/2016(H5N8<br>) | B3.3     | 2016-11-08      | EPI1019651                | EPI1019652                | EPI1019650               | EPI1019654               | EPI1019647               | EPI1019653               | EPI1019649               | EPI1019648               | Wageningen<br>Bioveterinary Research                                                                             | Wageningen<br>Bioveterinary<br>Research                               |
| A/gadwall/Chany/97/20<br>16(H5N8)                                   | B1.1     | 2016-09-10      | EPI925953                 | EPI925954                 | EPI925952                | EPI925956                | EPI925949                | EPI925955                | EPI925951                | EPI925950                | Research Institute of<br>Experimental and<br>Clinical Medicine                                                   | WHO National Influenza<br>Centre Russian<br>Federation                |
| A/gadwall/Kurgan/2442<br>/2016(H5N8)                                | B3.1     | 2016-08-27      | EPI961446                 | EPI961447                 | EPI961448                | EPI961449                | EPI961450                | EPI961451                | EPI961452                | EPI961453                |                                                                                                                  | State Research Center of<br>Virology and<br>Biotechnology<br>(VECTOR) |
| A/Go/NL-Roggebotsluis<br>/16014462-010/2016<br>(H5N8)               | B3.3     | 2016-11-17      | EPI1019659                | EPI1019660                | EPI1019658               | EPI1019662               | EPI1019655               | EPI1019661               | EPI1019657               | EPI1019656               | Wageningen<br>Bioveterinary Research                                                                             | Wageningen<br>Bioveterinary<br>Research                               |
| A/goose/Czech_Republi<br>c/136-17_1/2017(H5<br>N8)                  | B2       | 2017-01-04      | EPI1085342                | EPI1116594                | EPI1085343               | EPI1021087               | EPI1085344               | EPI1116595               | EPI1085345               | EPI1085346               | State Veterinary Institute<br>Prague                                                                             | State Veterinary Institute<br>Prague                                  |
| A/Goose/Hungary/1030<br>/2017(H5N8)                                 | B3.2     | 2017-01-11      | EPI954660                 | EPI954661                 | EPI954659                | EPI954663                | EPI954656                | EPI954662                | EPI954658                | EPI954657                | Central Agricultural<br>Office Veterinary<br>Diagnostic Directorate                                              | Central Agricultural<br>Office Veterinary<br>Diagnostic Directorate   |
| A/Goose/Hungary/1572<br>9/2017(H5N8)                                | B2       | 2017-04-07      | EPI1032481                | EPI1032482                | EPI1032480               | EPI1032484               | EPI1032477               | EPI1032483               | EPI1032479               | EPI1032478               | National Food Chain<br>Safety Office<br>Veterinary Diagnostic<br>Directorate Laboratory<br>for Molecular Biology | Central Agricultural<br>Office Veterinary<br>Diagnostic Directorate   |
| A/Goose/Hungary/5971<br>2/2016(H5N8)                                | B2       | 2016-11-26      | EPI956125                 | EPI956126                 | EPI956124                | EPI956128                | EPI956121                | EPI956127                | EPI956123                | EPI956122                | Central Agricultural<br>Office Veterinary<br>Diagnostic Directorate                                              | Central Agricultural<br>Office Veterinary<br>Diagnostic Directorate   |
| A/Goose/Hungary/5976<br>3/2016(H5N8)                                | B2       | 2016-11-27      | EPI1032513                | EPI1032514                | EPI1032512               | EPI1032516               | EPI1032509               | EPI1032515               | EPI1032511               | EPI1032510               | National Food Chain<br>Safety Office<br>Veterinary Diagnostic<br>Directorate Laboratory<br>for Molecular Biology | Central Agricultural<br>Office Veterinary<br>Diagnostic Directorate   |
| A/Goose/Hungary/6374<br>3/2016(H5N8)                                | B2       | 2016-12-11      | EPI1032537                | EPI1032538                | EPI1032536               | EPI1032540               | EPI1032533               | EPI1032539               | EPI1032535               | EPI1032534               | National Food Chain<br>Safety Office<br>Veterinary Diagnostic<br>Directorate Laboratory<br>for Molecular Biology | Central Agricultural<br>Office Veterinary<br>Diagnostic Directorate   |
| A/Goose/Hungary/6581<br>7/2016(H5N8)                                | B2.1     | 2016-12-18      | EPI954536                 | EPI954537                 | EPI954535                | EPI954539                | EPI954532                | EPI954538                | EPI954534                | EPI954533                | Central Agricultural<br>Office Veterinary<br>Diagnostic Directorate                                              | Central Agricultural<br>Office Veterinary<br>Diagnostic Directorate   |
| A/Goose/Hungary/982/<br>2017(H5N8)                                  | B2       | 2017-01-11      | EPI954644                 | EPI954645                 | EPI954643                | EPI954647                | EPI954640                | EPI954646                | EPI954642                | EPI954641                | Central Agricultural<br>Office Veterinary<br>Diagnostic Directorate                                              | Central Agricultural<br>Office Veterinary<br>Diagnostic Directorate   |
| A/goose/Italy/17VIR635<br>8-3/2017(H5N8)                            | B3.2     | 2017-08-05      | EPI1081966                | EPI1081967                | EPI1081968               | EPI1081969               | EPI1081970               | EPI1081971               | EPI1081972               | EPI1081973               | Istituto Zooprofilattico<br>Sperimentale Delle<br>Venezie                                                        | Istituto Zooprofilattico<br>Sperimentale Delle<br>Venezie             |
| A/goose/Krasnodar/314<br>4/2017(H5N8)                               | B3.2     | 2017-01-06      | EPI909433                 | EPI909434                 | EPI909435                | EPI909436                | EPI909437                | EPI909438                | EPI909439                | EPI909440                |                                                                                                                  | State Research Center of<br>Virology and<br>Biotechnology<br>(VECTOR) |
| A/Gr_bk-bd_gull/NL-Sl<br>oedorp/16014102-0<br>05/2016(H5N8)         | B3.3     | 2016-11-11      | EPI1019667                | EPI1019668                | EPI1019666               | EPI1019670               | EPI1019663               | EPI1019669               | EPI1019665               | EPI1019664               | Wageningen<br>Bioveterinary Research                                                                             | Wageningen<br>Bioveterinary<br>Research                               |
| A/great_crested_grebe/<br>Tyva/34/2016(H5N8)                        | B1       | 2016-05-25      | EPI823457                 | EPI823458                 | EPI823459                | EPI823460                | EPI823461                | EPI823462                | EPI823463                | EPI823464                | State Research Center of<br>Virology and<br>Biotechnology<br>(VECTOR)                                            | WHO National Influenza<br>Centre Russian<br>Federation                |
| A/great_crested_grebe/<br>Uvs-Nuur_Lake/341/<br>2016(H5N8)          | B1       | 2016-05-25      | EPI773754                 | EPI773755                 | EPI773756                | EPI773757                | EPI773758                | EPI773759                | EPI773760                | EPI773761                | Research Institute of<br>Experimental and<br>Clinical Medicine                                                   | Research Institute of<br>Experimental and<br>Clinical Medicine        |
| A/green-winged_teal/Eg<br>yp/871/2016(H5N8)                         | B1.1     | 2016-12-08      | EPI1010497                | EPI1010498                | EPI1010494               | EPI1010489               | EPI1010496               | EPI1010486               | EPI1010490               | EPI1010492               |                                                                                                                  | Other Database Import                                                 |

Supplementary Table 1. Continued

| Virus name                                         | Genotype | Collection date | GISAID PB2 accession No. | GISAID PB1 accession No. | GISAID PA accession No. | GISAID HA accession No. | GISAID NP accession No. | GISAID NA accession No. | GISAID MP accession No. | GISAID NS accession No. | GISAID originating laboratory (where given)                                                          | GISAID submitting laboratory                                  |
|----------------------------------------------------|----------|-----------------|--------------------------|--------------------------|-------------------------|-------------------------|-------------------------|-------------------------|-------------------------|-------------------------|------------------------------------------------------------------------------------------------------|---------------------------------------------------------------|
| A/Grey_Go/NL-Groot-Ammers/16015901-012/2016(H5N8)  | B3.1     | 2016-12-14      | EPI1019675               | EPI1019676               | EPI1019674              | EPI1019678              | EPI1019671              | EPI1019677              | EPI1019673              | EPI1019672              | Wageningen Bioveterinary Research                                                                    | Wageningen Bioveterinary Research                             |
| A/grey/heron/W779/2017(H5N8)                       | B1.1     | 2017-01-27      | EPI1034964               | EPI1034972               | EPI1034973              | EPI1034974              | EPI1034975              | EPI1034976              | EPI1034977              | EPI1034978              |                                                                                                      | Other Database Import                                         |
| A/greylag_goose/Germany-NI/AR703-L02138/2017(H5N8) | B2.1     | 2017-01-25      | EPI990799                | EPI990800                | EPI990798               | EPI990802               | EPI990795               | EPI990801               | EPI990797               | EPI990796               |                                                                                                      | Friedrich-Loeffler-Institut                                   |
| A/Greylag_goose/Hungary/1941/2017(H5N8)            | B2       | 2017-01-18      | EPI954676                | EPI954677                | EPI954675               | EPI954679               | EPI954672               | EPI954678               | EPI954674               | EPI954673               | Central Agricultural Office Veterinary Diagnostic Directorate                                        | Central Agricultural Office Veterinary Diagnostic Directorate |
| A/Greylag_goose/Hungary/320/2017(H5N8)             | B3.2     | 2017-01-04      | EPI954810                | EPI954811                | EPI954809               | EPI954813               | EPI954806               | EPI954812               | EPI954808               | EPI954807               | Central Agricultural Office Veterinary Diagnostic Directorate                                        | Central Agricultural Office Veterinary Diagnostic Directorate |
| A/GuineaFowl/Hungary/596/2017(H5N8)                | B2       | 2017-01-06      | EPI954818                | EPI954819                | EPI954817               | EPI954821               | EPI954814               | EPI954820               | EPI954816               | EPI954815               | Central Agricultural Office Veterinary Diagnostic Directorate                                        | Central Agricultural Office Veterinary Diagnostic Directorate |
| A/Cull/NL-Marker Wadden/16014466-020/2016(H5N8)    | B3.2     | 2016-11-17      | EPI1019683               | EPI1019684               | EPI1019682              | EPI1019686              | EPI1019679              | EPI1019685              | EPI1019681              | EPI1019680              | Wageningen Bioveterinary Research                                                                    | Wageningen Bioveterinary Research                             |
| A/Harris_Hawk/Hungary/120/2017(H5N8)               | B2       | 2017-01-02      | EPI954636                | EPI954637                | EPI954635               | EPI954639               | EPI954632               | EPI954638               | EPI954634               | EPI954633               | Central Agricultural Office Veterinary Diagnostic Directorate                                        | Central Agricultural Office Veterinary Diagnostic Directorate |
| A/Harris_hawk/Hungary/2762a/2017(H5N8)             | B2       | 2017-01-24      | EPI954788                | EPI954789                | EPI954787               | EPI954791               | EPI954784               | EPI954790               | EPI954786               | EPI954785               | Central Agricultural Office Veterinary Diagnostic Directorate                                        | Central Agricultural Office Veterinary Diagnostic Directorate |
| A/L-bi-ba-gull/NL-Sovon/16014324-014/2016(H5N8)    | B3.3     | 2016-11-16      | EPI1019707               | EPI1019708               | EPI1019706              | EPI1019710              | EPI1019703              | EPI1019709              | EPI1019705              | EPI1019704              | Wageningen Bioveterinary Research                                                                    | Wageningen Bioveterinary Research                             |
| A/long-eared_owl/Voronezh/15/2017(H5N8)            | B3.2     | 2017-01-06      | EPI909377                | EPI909378                | EPI909379               | EPI909380               | EPI909381               | EPI909382               | EPI909383               | EPI909384               |                                                                                                      | State Research Center of Virology and Biotechnology (VECTOR)  |
| A/M_Swan/NL-Roggebois/16014462-019/2016(H5N8)      | B3.2     | 2016-11-17      | EPI1019715               | EPI1019716               | EPI1019714              | EPI1019718              | EPI1019711              | EPI1019717              | EPI1019713              | EPI1019712              | Wageningen Bioveterinary Research                                                                    | Wageningen Bioveterinary Research                             |
| A/Magpie/NL-Volendam/16014331-002/2016(H5N8)       | B3.3     | 2016-11-16      | EPI1019723               | EPI1019724               | EPI1019722              | EPI1019726              | EPI1019719              | EPI1019725              | EPI1019721              | EPI1019720              | Wageningen Bioveterinary Research                                                                    | Wageningen Bioveterinary Research                             |
| A/Mal/NL-IJsselmuiden/16015448-002/2016(H5N8)      | B3.1     | 2016-12-06      | EPI1019731               | EPI1019732               | EPI1019730              | EPI1019734              | EPI1019727              | EPI1019733              | EPI1019729              | EPI1019728              | Wageningen Bioveterinary Research                                                                    | Wageningen Bioveterinary Research                             |
| A/Mal/NL-Mastenbroek/16015378-002/2016(H5N8)       | B3.3     | 2016-12-05      | EPI1019739               | EPI1019740               | EPI1019738              | EPI1019742              | EPI1019735              | EPI1019741              | EPI1019737              | EPI1019736              | Wageningen Bioveterinary Research                                                                    | Wageningen Bioveterinary Research                             |
| A/mallard_duck/Korea/WA137/2017(H5N8)              | B1.1     | 2017-01-24      | EPI952757                | EPI952760                | EPI952769               | EPI952782               | EPI952791               | EPI952799               | EPI952800               | EPI952801               | Avian disease division, Animal and Plant Quarantine Agency                                           | Animal and Plant Quarantine Agency (QIA)                      |
| A/Mallard/Hungary/1574a/2017(H5N8)                 | B3.2     | 2017-01-14      | EPI954874                | EPI954875                | EPI954873               | EPI954877               | EPI954870               | EPI954876               | EPI954872               | EPI954871               | Central Agricultural Office Veterinary Diagnostic Directorate                                        | Central Agricultural Office Veterinary Diagnostic Directorate |
| A/mallard/Hungary/57857/2016(H5N8)                 | B2       | 2016-11-21      | EPI953764                | EPI953765                | EPI953761               | EPI953337               | EPI953731               | EPI953544               | EPI953518               | EPI953757               | Central Agricultural Office Veterinary Diagnostic Directorate                                        | Central Agricultural Office Veterinary Diagnostic Directorate |
| A/Mallard/Hungary/5821/2017(H5N8)                  | B2       | 2017-02-13      | EPI954842                | EPI954843                | EPI954841               | EPI954845               | EPI954838               | EPI954844               | EPI954840               | EPI954839               | Central Agricultural Office Veterinary Diagnostic Directorate                                        | Central Agricultural Office Veterinary Diagnostic Directorate |
| A/mallard/Korea/Jeju-H24/2017(H5N6)                | B3.2.1   | 2017-11-27      | EPI1123332               | EPI1123333               | EPI1123334              | EPI1123335              | EPI1123336              | EPI1123337              | EPI1123338              | EPI1123339              | Avian Influenza Research and Diagnostic Division, Animal and Plant Quarantine Agency                 | Animal and Plant Quarantine Agency (QIA)                      |
| A/Mulard_duck/Hungary/54494/2016(H5N8)             | B2       | 2016-11-08      | EPI860512                | EPI860511                | EPI860513               | EPI860518               | EPI860514               | EPI860515               | EPI860516               | EPI860517               | National Food Chain Safety Office Veterinary Diagnostic Directorate Laboratory for Molecular Biology | Central Agricultural Office Veterinary Diagnostic Directorate |
| A/mute_swan/Croatia/70/2016(H5N8)                  | B2       | 2016-10-30      | EPI867457                | EPI869084                | EPI867456               | EPI861568               | EPI865159               | EPI861569               | EPI861570               | EPI861571               |                                                                                                      | Croatian Veterinary Institute                                 |
| A/mute_swan/Czech Republic/54-17_2/2017(H5N8)      | B2       | 2017-01-02      | EPI1081882               | EPI1081883               | EPI1081884              | EPI930838               | EPI1081885              | EPI961454               | EPI930839               | EPI1081886              |                                                                                                      | State Veterinary Institute Prague                             |
| A/mute_swan/Germany-NI/AR1529-L02145/2017(H5N8)    | B3.2     | 2017-02-14      | EPI990783                | EPI990784                | EPI990782               | EPI990786               | EPI990779               | EPI990785               | EPI990781               | EPI990780               |                                                                                                      | Friedrich-Loeffler-Institut                                   |
| A/Mute_swan/Hungary/1955/2017(H5N8)                | B2       | 2017-01-18      | EPI954684                | EPI954685                | EPI954683               | EPI954687               | EPI954680               | EPI954686               | EPI954682               | EPI954681               | Central Agricultural Office Veterinary Diagnostic Directorate                                        | Central Agricultural Office Veterinary Diagnostic Directorate |
| A/Mute_swan/Hungary/2193/2017(H5N8)                | B2       | 2017-01-19      | EPI954700                | EPI954701                | EPI954699               | EPI954703               | EPI954696               | EPI954702               | EPI954698               | EPI954697               | Central Agricultural Office Veterinary Diagnostic Directorate                                        | Central Agricultural Office Veterinary Diagnostic Directorate |
| A/Mute_swan/Hungary/2508/2017(H5N8)                | B2       | 2017-01-22      | EPI954708                | EPI954709                | EPI954707               | EPI954711               | EPI954704               | EPI954710               | EPI954706               | EPI954705               | Central Agricultural Office Veterinary Diagnostic Directorate                                        | Central Agricultural Office Veterinary Diagnostic Directorate |
| A/Mute_swan/Hungary/3513/2017(H5N8)                | B2       | 2017-01-27      | EPI954732                | EPI954733                | EPI954731               | EPI954735               | EPI954728               | EPI954734               | EPI954730               | EPI954729               | Central Agricultural Office Veterinary Diagnostic Directorate                                        | Central Agricultural Office Veterinary Diagnostic Directorate |
| A/Mute_swan/Hungary/6092/2017(H5N8)                | B2.1     | 2017-02-15      | EPI959528                | EPI959529                | EPI959527               | EPI959531               | EPI959524               | EPI959530               | EPI959526               | EPI959525               | National Food Chain Safety Office Veterinary Diagnostic Directorate Laboratory for Molecular Biology | Central Agricultural Office Veterinary Diagnostic Directorate |
| A/Mute_swan/Hungary/6276/2017(H5N8)                | B2       | 2017-02-16      | EPI959536                | EPI959537                | EPI959535               | EPI959539               | EPI959532               | EPI959538               | EPI959534               | EPI959533               | National Food Chain Safety Office Veterinary Diagnostic Directorate Laboratory for Molecular Biology | Central Agricultural Office Veterinary Diagnostic Directorate |
| A/mute_swan/Kaliningrad/132/2017(H5N8)             | B3.3     | 2017-02-13      | EPI1044543               | EPI1044546               | EPI1044547              | EPI1044550              | EPI1044548              | EPI1044549              | EPI1044552              | EPI1044551              |                                                                                                      | State Research Center of Virology and Biotechnology (VECTOR)  |

Supplementary Table 1. Continued

| Virus name                                                   | Genotype | Collection date | GISAIID PB2 accession No. | GISAIID PB1 accession No. | GISAIID PA accession No. | GISAIID HA accession No. | GISAIID NP accession No. | GISAIID NA accession No. | GISAIID MP accession No. | GISAIID NS accession No. | GISAIID originating laboratory (where given)                                                         | GISAIID submitting laboratory                                 |
|--------------------------------------------------------------|----------|-----------------|---------------------------|---------------------------|--------------------------|--------------------------|--------------------------|--------------------------|--------------------------|--------------------------|------------------------------------------------------------------------------------------------------|---------------------------------------------------------------|
| A/mute swan/Krasnodar/25/2017(H5N8)                          | B3.2     | 2017-01-06      | EPI909441                 | EPI909442                 | EPI909443                | EPI909444                | EPI909445                | EPI909446                | EPI909447                | EPI909448                |                                                                                                      | State Research Center of Virology and Biotechnology (VECTOR)  |
| A/mute swan/Shimane/3211A001/2017(H5N6)                      | B3.2.1   | 2017-11-05      | EPI1127535                | EPI1127536                | EPI1127537               | EPI1127538               | EPI1127539               | EPI1127540               | EPI1127541               | EPI1127556               |                                                                                                      | Other Database Import                                         |
| A/P_falcon/NL-Vrouwepolder (Zeeland)/16015510-001/2016(H5N8) | B3.3     | 2016-12-07      | EPI1019747                | EPI1019748                | EPI1019746               | EPI1019750               | EPI1019743               | EPI1019749               | EPI1019745               | EPI1019744               | Wageningen Bioveterinary Research                                                                    | Wageningen Bioveterinary Research                             |
| A/painted stork/India/10CA03/2016 (H5N8)                     | B1.1     | 2016-10-20      | EPI858841                 | EPI858842                 | EPI858843                | EPI858844                | EPI858845                | EPI858846                | EPI858847                | EPI858848                | ICAR-National Institute of High Security Animal Diseases                                             | ICAR-National Institute of High Security Animal Diseases      |
| A/peacock/Belgium/1017/2017(H5N8)                            | B3.2     | 2017-02-08      | EPI1007672                | EPI1007673                | EPI1007674               | EPI1007675               | EPI1007676               | EPI1007677               | EPI1007678               | EPI1007679               |                                                                                                      | Other Database Import                                         |
| A/Peregrine falcon/Hungary/4882/2017(H5N8)                   | B3.2     | 2017-02-07      | EPI954756                 | EPI954757                 | EPI954755                | EPI954759                | EPI954752                | EPI954758                | EPI954754                | EPI954753                | Central Agricultural Office Veterinary Diagnostic Directorate                                        | Central Agricultural Office Veterinary Diagnostic Directorate |
| A/Pheasant/Hungary/6553/2017(H5N8)                           | B2       | 2017-02-16      | EPI959544                 | EPI959545                 | EPI959543                | EPI959547                | EPI959540                | EPI959546                | EPI959542                | EPI959541                | Central Agricultural Office Veterinary Diagnostic Directorate                                        | Central Agricultural Office Veterinary Diagnostic Directorate |
| A/Rook/Hungary/4975/2017(H5N8)                               | B2       | 2017-02-08      | EPI959560                 | EPI959561                 | EPI959559                | EPI959563                | EPI959556                | EPI959562                | EPI959558                | EPI959557                | National Food Chain Safety Office Veterinary Diagnostic Directorate Laboratory for Molecular Biology |                                                               |
| A/Sea eagle/NL-Assen/16015398-002/2016(H5N8)                 | B3.2     | 2016-12-05      | EPI1019755                | EPI1019756                | EPI1019754               | EPI1019758               | EPI1019751               | EPI1019757               | EPI1019753               | EPI1019752               | Wageningen Bioveterinary Research                                                                    | Wageningen Bioveterinary Research                             |
| A/shelduck/Italy/17VIR1572-24/2017(H5N8)                     | B2       | 2017-01-03      | EPI961497                 | EPI961498                 | EPI961496                | EPI961500                | EPI961493                | EPI961499                | EPI961495                | EPI961494                | Istituto Zooprofilattico Sperimentale Delle Venezie                                                  | Istituto Zooprofilattico Sperimentale Delle Venezie           |
| A/Swan/Italy/17VIR537-2/2017(H5N8)                           | B3.2     | 2017-01-19      | EPI954556                 | EPI954557                 | EPI954555                | EPI954559                | EPI954552                | EPI954558                | EPI954554                | EPI954553                | Istituto Zooprofilattico Sperimentale Delle Venezie                                                  | Istituto Zooprofilattico Sperimentale Delle Venezie           |
| A/Swan/Italy/17VIR7064-1/2017(H5N8)                          | B3.2     | 2017-08-25      | EPI1081918                | EPI1081919                | EPI1081920               | EPI1081925               | EPI1081922               | EPI1081923               | EPI1081924               | EPI1081921               | Istituto Zooprofilattico Sperimentale Delle Venezie                                                  | Istituto Zooprofilattico Sperimentale Delle Venezie           |
| A/T_Dk/NL-Almeerder Zand/16014341-003/2016(H5N8)             | B3.2     | 2016-11-16      | EPI1019763                | EPI1019764                | EPI1019762               | EPI1019766               | EPI1019759               | EPI1019765               | EPI1019761               | EPI1019760               | Wageningen Bioveterinary Research                                                                    | Wageningen Bioveterinary Research                             |
| A/T_Dk/NL-Monnicken dam/16013865-006-008/2016(H5N8)          | B3.3     | 2016-11-08      | EPI1019771                | EPI1019772                | EPI1019770               | EPI1019774               | EPI1019767               | EPI1019773               | EPI1019769               | EPI1019768               | Wageningen Bioveterinary Research                                                                    | Wageningen Bioveterinary Research                             |
| A/T_Dk/NL-Roggebotsluis/16014462-015/2016(H5N8)              | B3.2     | 2016-11-17      | EPI1019779                | EPI1019780                | EPI1019778               | EPI1019782               | EPI1019775               | EPI1019781               | EPI1019777               | EPI1019776               | Wageningen Bioveterinary Research                                                                    | Wageningen Bioveterinary Research                             |
| A/T_Dk/NL-Rotterdam/16014155-001/2016(H5N8)                  | B3.2     | 2016-11-14      | EPI1019787                | EPI1019788                | EPI1019786               | EPI1019790               | EPI1019783               | EPI1019789               | EPI1019785               | EPI1019784               | Wageningen Bioveterinary Research                                                                    | Wageningen Bioveterinary Research                             |
| A/T_Dk/NL-Werkendam/16014159-002/2016(H5N8)                  | B3.3     | 2016-11-14      | EPI1019795                | EPI1019796                | EPI1019794               | EPI1019798               | EPI1019791               | EPI1019797               | EPI1019793               | EPI1019792               | Wageningen Bioveterinary Research                                                                    | Wageningen Bioveterinary Research                             |
| A/T_Dk/NL-Zeevolde/16013976-001/2016(H5N8)                   | B3.2     | 2016-11-09      | EPI1019811                | EPI1019812                | EPI1019810               | EPI1019814               | EPI1019807               | EPI1019813               | EPI1019809               | EPI1019808               | Wageningen Bioveterinary Research                                                                    | Wageningen Bioveterinary Research                             |
| A/T_Dk/NL-Zuidoost_Beemster/16014148-002/2016(H5N8)          | B3.2     | 2016-11-14      | EPI1019859                | EPI1019860                | EPI1019858               | EPI1019862               | EPI1019855               | EPI1019861               | EPI1019857               | EPI1019856               | Wageningen Bioveterinary Research                                                                    | Wageningen Bioveterinary Research                             |
| A/Teal/NL-Ferwert/16015273-013/2016(H5N8)                    | B3.2     | 2016-12-01      | EPI1019875                | EPI1019876                | EPI1019874               | EPI1019878               | EPI1019871               | EPI1019877               | EPI1019873               | EPI1019872               | Wageningen Bioveterinary Research                                                                    | Wageningen Bioveterinary Research                             |
| A/tufted duck/Denmark/17740-1/2016(H5N8)                     | B3.2     | 2016-11-08      | EPI909361                 | EPI909362                 | EPI909363                | EPI909364                | EPI909365                | EPI909366                | EPI909367                | EPI909368                | Technical University of Denmark                                                                      | Animal and Plant Health Agency (APHA)                         |
| A/tufted duck/Germany/AR8444-L01986/2016(H5N8)               | B3.2     | 2016-11-07      | EPI860494                 | EPI860495                 | EPI860496                | EPI860509                | EPI860497                | EPI860510                | EPI860498                | EPI860499                |                                                                                                      | Friedrich-Loeffler-Institut                                   |
| A/tufted duck/Switzerland/V237/2016(H5N8)                    | B3.2     | 2016-11-13      | EPI969251                 | EPI969252                 | EPI969253                | EPI969254                | EPI969255                | EPI969256                | EPI969257                | EPI969258                | Institute of Virology and Immunology IVI                                                             | Faculty of Veterinary Medicine at the University of Bern      |
| A/turkey/Czech Republic/38-17_1/2017(H5N8)                   | B2       | 2017-01-03      | EPI1081899                | EPI1081892                | EPI1081893               | EPI1081894               | EPI1081895               | EPI1081896               | EPI1081897               | EPI1081898               | State Veterinary Institute Prague                                                                    | State Veterinary Institute Prague                             |
| A/turkey/England/3778/2017(H5N8)                             | B3.1     | 2017-01-15      | EPI942932                 | EPI942933                 | EPI942934                | EPI942935                | EPI942936                | EPI942937                | EPI942938                | EPI942939                | Animal and Plant Health Agency (APHA)                                                                | Animal and Plant Health Agency (APHA)                         |
| A/turkey/England/52131/2016(H5N8)                            | B3.1     | 2016-12-15      | EPI868845                 | EPI868846                 | EPI868847                | EPI868848                | EPI868849                | EPI868850                | EPI868851                | EPI868852                | Animal and Plant Health Agency (APHA)                                                                | Animal and Plant Health Agency (APHA)                         |
| A/turkey/Germany-SH/R8595/2016(H5N8)                         | B3.2     | 2016-11-09      | EPI916719                 | EPI922322                 | EPI861185                | EPI861011                | EPI861394                | EPI861010                | EPI916716                | EPI916717                |                                                                                                      | Friedrich-Loeffler-Institut                                   |
| A/Turkey/Hungary/2030/2017(H5N8)                             | B2       | 2017-01-18      | EPI954692                 | EPI954693                 | EPI954691                | EPI954695                | EPI954688                | EPI954694                | EPI954690                | EPI954689                | Central Agricultural Office Veterinary Diagnostic Directorate                                        | Central Agricultural Office Veterinary Diagnostic Directorate |
| A/Turkey/Hungary/53136/2016(H5N8)                            | B2       | 2016-11-01      | EPI962062                 | EPI962063                 | EPI962061                | EPI962066                | EPI962058                | EPI962065                | EPI962060                | EPI962059                | National Food Chain Safety Office Veterinary Diagnostic Directorate Laboratory for Molecular Biology | Central Agricultural Office Veterinary Diagnostic Directorate |
| A/turkey/Italy/17VIR1338-3/2017(H5N8)                        | B2       | 2017-02-14      | EPI954596                 | EPI954597                 | EPI954595                | EPI954599                | EPI954592                | EPI954598                | EPI954594                | EPI954593                | Istituto Zooprofilattico Sperimentale Delle Venezie                                                  | Istituto Zooprofilattico Sperimentale Delle Venezie           |
| A/turkey/Italy/17VIR1452-22/2017(H5N8)                       | B3.2     | 2017-02-16      | EPI954604                 | EPI954605                 | EPI954603                | EPI954607                | EPI954600                | EPI954606                | EPI954602                | EPI954601                | Istituto Zooprofilattico Sperimentale Delle Venezie                                                  | Istituto Zooprofilattico Sperimentale Delle Venezie           |
| A/turkey/Italy/17VIR538-1/2017(H5N8)                         | B1.1     | 2017-01-20      | EPI954564                 | EPI954565                 | EPI954563                | EPI954567                | EPI954560                | EPI954566                | EPI954562                | EPI954561                | Istituto Zooprofilattico Sperimentale Delle Venezie                                                  | Istituto Zooprofilattico Sperimentale Delle Venezie           |
| A/turkey/Italy/17VIR576-11/2017(H5N8)                        | B3.2     | 2017-01-23      | EPI954572                 | EPI954573                 | EPI954571                | EPI954575                | EPI954568                | EPI954574                | EPI954570                | EPI954569                | Istituto Zooprofilattico Sperimentale Delle Venezie                                                  | Istituto Zooprofilattico Sperimentale Delle Venezie           |

Supplementary Table 1. Continued

| Virus name                                             | Genotype | Collection date | GISAID PB2 accession No. | GISAID PB1 accession No. | GISAID PA accession No. | GISAID HA accession No. | GISAID NP accession No. | GISAID NA accession No. | GISAID MP accession No. | GISAID NS accession No. | GISAID originating laboratory (where given)                                                                 | GISAID submitting laboratory                                 |
|--------------------------------------------------------|----------|-----------------|--------------------------|--------------------------|-------------------------|-------------------------|-------------------------|-------------------------|-------------------------|-------------------------|-------------------------------------------------------------------------------------------------------------|--------------------------------------------------------------|
| A/turkey/Italy/17/IR58<br>78-3/2017(H5N8)              | B3.2     | 2017-07-23      | EPI1040227               | EPI1040228               | EPI1040229              | EPI1040225              | EPI1040231              | EPI1040226              | EPI1040232              | EPI1040230              | Istituto Zooprofilattico Sperimentale Delle Venezie                                                         | Istituto Zooprofilattico Sperimentale Delle Venezie          |
| A/turkey/Italy/17/IR97<br>3-2/2017(H5N8)               | B2       | 2017-02-01      | EPI954588                | EPI954589                | EPI954587               | EPI954591               | EPI954584               | EPI954590               | EPI954586               | EPI954585               | Istituto Zooprofilattico Sperimentale Delle Venezie                                                         | Istituto Zooprofilattico Sperimentale Delle Venezie          |
| A/turkey/Rostov/11/2017<br>(H5N8)                      | B3.2     | 2017-01-01      | EPI909425                | EPI909426                | EPI909427               | EPI909428               | EPI909429               | EPI909430               | EPI909431               | EPI909432               |                                                                                                             | State Research Center of Virology and Biotechnology (VECTOR) |
| A/Ural_owl/Voronezh/14/2017(H5N8)                      | B3.2     | 2017-01-06      | EPI909385                | EPI909386                | EPI909387               | EPI909388               | EPI909389               | EPI909390               | EPI909391               | EPI909392               |                                                                                                             | State Research Center of Virology and Biotechnology (VECTOR) |
| A/spoonbill/Taiwan/DB<br>645/2017(H5N6)                | B3.2.1   | 2017-12-01      | EPI1119037               | EPI1119048               | EPI1119057              | EPI1119065              | EPI1119072              | EPI1119073              | EPI1119074              | EPI1119075              |                                                                                                             | Animal Health Research Institute                             |
| A/duck/Korea/H56/2017<br>(H5N6)                        | B3.1.1   | 2017-12-19      | EPI1145178               | EPI1145179               | EPI1145180              | EPI1145181              | EPI1145182              | EPI1145183              | EPI1145184              | EPI1145185              | Avian Influenza Research and Diagnostic Division, Animal and Plant Quarantine Agency                        | Animal and Plant Quarantine Agency (APQA)                    |
| A/duck/Korea/H70/2017<br>(H5N6)                        | B3.1.1   | 2017-12-22      | EPI1145295               | EPI1145296               | EPI1145297              | EPI1145298              | EPI1145299              | EPI1145300              | EPI1145301              | EPI1145302              | Avian Influenza Research and Diagnostic Division, Animal and Plant Quarantine Agency                        | Animal and Plant Quarantine Agency (APQA)                    |
| A/duck/Korea/H80/2017<br>(H5N6)                        | B3.1.1   | 2017-12-26      | EPI1145303               | EPI1145304               | EPI1145305              | EPI1145306              | EPI1145307              | EPI1145308              | EPI1145309              | EPI1145310              | Avian Influenza Research and Diagnostic Division, Animal and Plant Quarantine Agency                        | Animal and Plant Quarantine Agency (APQA)                    |
| A/duck/Korea/H81/2017<br>(H5N6)                        | B3.1.1   | 2017-12-26      | EPI1145311               | EPI1145312               | EPI1145313              | EPI1145314              | EPI1145315              | EPI1145316              | EPI1145317              | EPI1145318              | Avian Influenza Research and Diagnostic Division, Animal and Plant Quarantine Agency                        | Animal and Plant Quarantine Agency (APQA)                    |
| A/duck/Korea/H103/2017<br>(H5N6)                       | B3.1.1   | 2017-12-28      | EPI1145319               | EPI1145320               | EPI1145321              | EPI1145322              | EPI1145323              | EPI1145324              | EPI1145325              | EPI1145326              | Avian Influenza Research and Diagnostic Division, Animal and Plant Quarantine Agency                        | Animal and Plant Quarantine Agency (APQA)                    |
| A/duck/Korea/H107/2017<br>(H5N6)                       | B3.1.1   | 2017-12-28      | EPI1145327               | EPI1145328               | EPI1145329              | EPI1145330              | EPI1145331              | EPI1145332              | EPI1145333              | EPI1145334              | Avian Influenza Research and Diagnostic Division, Animal and Plant Quarantine Agency                        | Animal and Plant Quarantine Agency (APQA)                    |
| A/mandarin_duck/Korea/H69/2017<br>(H5N6)               | B3.1.1   | 2017-12-19      | EPI1145335               | EPI1145336               | EPI1145337              | EPI1145338              | EPI1145339              | EPI1145340              | EPI1145341              | EPI1145342              | Avian Influenza Research and Diagnostic Division, Animal and Plant Quarantine Agency                        | Animal and Plant Quarantine Agency (APQA)                    |
| A/mandarin_duck/Korea/H71/2017<br>(H5N6)               | B3.1.1   | 2017-12-20      | EPI1145343               | EPI1145344               | EPI1145345              | EPI1145346              | EPI1145347              | EPI1145348              | EPI1145349              | EPI1145350              | Avian Influenza Research and Diagnostic Division, Animal and Plant Quarantine Agency                        | Animal and Plant Quarantine Agency (APQA)                    |
| A/mandarin_duck/Korea/H119-3/2017<br>(H5N6)            | B3.1.1   | 2017-12-28      | EPI1145351               | EPI1145352               | EPI1145353              | EPI1145354              | EPI1145355              | EPI1145356              | EPI1145357              | EPI1145358              | Avian Influenza Research and Diagnostic Division, Animal and Plant Quarantine Agency                        | Animal and Plant Quarantine Agency (APQA)                    |
| A/chicken/Greece/39/2017<br>(H5N6)                     | B3.2.1   | 2017-02-06      | EPI1122874               | EPI1122875               | EPI1122876              | EPI1122877              | EPI1122878              | EPI1122879              | EPI1122880              | EPI1122881              | Thessalonica Veterinary Centre (TVC)                                                                        | Animal and Plant Health Agency (APHA)                        |
| A/Great Black-backed Gull/Netherlands/1/2017<br>(H5N6) | B3.1.1   | 2017-12-18      | EPI1131085               | EPI1131086               | EPI1131087              | EPI1131088              | EPI1131089              | EPI1131090              | EPI1131091              | EPI1131092              | Erasmus Medical Center                                                                                      | Erasmus Medical Center                                       |
| A/Great Black-backed Gull/Netherlands/2/2017<br>(H5N6) | B3.3.1   | 2017-12-18      | EPI1131093               | EPI1131094               | EPI1131095              | EPI1131096              | EPI1131097              | EPI1131098              | EPI1131099              | EPI1131100              | Erasmus Medical Center                                                                                      | Erasmus Medical Center                                       |
| A/breeder duck/Korea/Gochang<br>1/2014(H5N8)           | B0       | 2014-01-16      | EPI509696                | EPI509697                | EPI509692               | EPI509698               | EPI509699               | EPI509700               | EPI509701               | EPI509710               | Animal and Plant Quarantine Agency (APQA)                                                                   | Animal and Plant Quarantine Agency (APQA)                    |
| A/Baikal teal/Korea/H52/2014<br>(H5N8)                 | B0       | 2014-01-20      | EPI561492                | EPI561494                | EPI561498               | EPI561495               | EPI561503               | EPI561493               | EPI561504               | EPI561505               | Animal and Plant Quarantine Agency (APQA)                                                                   | Animal and Plant Quarantine Agency (APQA)                    |
| A/duck/Zhejiang/W24/2013<br>(H5N8)                     | B0       | 2013-11-14      | EPI530979                | EPI530981                | EPI530983               | EPI530985               | EPI530987               | EPI530989               | EPI530991               | EPI530993               |                                                                                                             | Other Database Import                                        |
| A/duck/Zhejiang/6D18/2013<br>(H5N8)                    | B0       | 2013-12-14      | EPI530980                | EPI530982                | EPI530984               | EPI530986               | EPI530988               | EPI530990               | EPI530992               | EPI530994               |                                                                                                             | Other Database Import                                        |
| A/barnacle_goose/Netherlands/2/2014<br>(H3N6)          |          | 2014-12-15      | EPI1010642               | EPI1014832               | EPI1014069              | EPI1010875              | EPI1014128              | EPI1011098              | EPI1010945              | EPI1014874              |                                                                                                             | Other Database Import                                        |
| A/Caspian seal/Russia/1884/2002<br>(H4N6)              |          | 2002-07-20      |                          |                          |                         |                         |                         | EPI533775               |                         |                         |                                                                                                             | Other Database Import                                        |
| A/Caspian seal/Russia/T1/2012<br>(H4N6)                |          | 2012-10-03      |                          |                          |                         |                         |                         | EPI533781               |                         |                         |                                                                                                             | Other Database Import                                        |
| A/chicken/Hunan/S1248/2010<br>(H4N6)                   |          | 2010-03-03      |                          |                          |                         |                         |                         | EPI692338               |                         |                         |                                                                                                             | Other Database Import                                        |
| A/chicken/India/WB-NI<br>V101006/2009<br>(H4N6)        |          | 2009-12-17      |                          |                          |                         |                         |                         | EPI395392               |                         |                         |                                                                                                             | Other Database Import                                        |
| A/duck/Bangladesh/1283/2008<br>(H4N6)                  |          | 2008-12-21      |                          |                          |                         |                         |                         | EPI540374               |                         |                         | Institute of Epidemiology Disease Control and Research (IEDCR) & Bangladesh National Influenza Centre (NIC) | Centers for Disease Control and Prevention                   |
| A/duck/Bangladesh/1521/2009<br>(H4N6)                  |          | 2009-10-21      |                          |                          |                         |                         |                         | EPI540366               |                         |                         | Institute of Epidemiology Disease Control and Research (IEDCR) & Bangladesh National Influenza Centre (NIC) | Centers for Disease Control and Prevention                   |

Supplementary Table 1. Continued

| Virus name                                          | Genotype | Collection date | GISAIID PB2 accession No. | GISAIID PB1 accession No. | GISAIID PA accession No. | GISAIID HA accession No. | GISAIID NP accession No. | GISAIID NA accession No. | GISAIID MP accession No. | GISAIID NS accession No. | GISAIID originating laboratory (where given)                                                                | GISAIID submitting laboratory                            |
|-----------------------------------------------------|----------|-----------------|---------------------------|---------------------------|--------------------------|--------------------------|--------------------------|--------------------------|--------------------------|--------------------------|-------------------------------------------------------------------------------------------------------------|----------------------------------------------------------|
| A/duck/Bangladesh/176/2010(H4N6)                    |          | 2010-10-27      |                           |                           |                          |                          |                          | EPI540358                |                          |                          | Institute of Epidemiology Disease Control and Research (IEDCR) & Bangladesh National Influenza Centre (NIC) | Centers for Disease Control and Prevention               |
| A/duck/Bangladesh/269/18/2015(H3N6)                 |          | 2015-12-09      |                           |                           |                          |                          |                          | EPI965295                |                          |                          |                                                                                                             | Other Database Import                                    |
| A/duck/Henan/S1091/2010(H7N6)                       |          | 2010-03-03      |                           |                           |                          |                          |                          | EPI692466                |                          |                          |                                                                                                             | Other Database Import                                    |
| A/duck/Hunan/S1012/2009(H4N6)                       |          | 2009-03-03      |                           |                           |                          |                          |                          | EPI692506                |                          |                          |                                                                                                             | Other Database Import                                    |
| A/duck/Jiangsu/4/2010(H3N6)                         |          | 2010-03-01      |                           |                           |                          |                          |                          | EPI414148                |                          |                          |                                                                                                             | Other Database Import                                    |
| A/duck/Korea/DY104/2007(H4N6)                       |          | 2007-12-01      |                           |                           |                          |                          |                          | EPI401303                |                          |                          |                                                                                                             | Other Database Import                                    |
| A/duck/Mongolia/101/2015(H4N6)                      |          | 2015-08-30      |                           |                           |                          |                          |                          | EPI704269                |                          |                          |                                                                                                             | Other Database Import                                    |
| A/duck/Mongolia/262/2011(H4N6)                      |          | 2011-09-01      |                           |                           |                          |                          |                          | EPI1133993               |                          |                          |                                                                                                             | Other Database Import                                    |
| A/duck/Mongolia/769/2015(H4N6)                      |          | 2015-08-31      |                           |                           |                          |                          |                          | EPI704432                |                          |                          |                                                                                                             | Other Database Import                                    |
| A/duck/Mongolia/OIE-7438/2011(H4N6)                 |          | 2011-09-10      |                           |                           |                          |                          |                          | EPI357825                |                          |                          |                                                                                                             | Other Database Import                                    |
| A/duck/Moscow/4781/2012(H4N6)                       |          | 2012-10-01      |                           |                           |                          |                          |                          | EPI1036196               |                          |                          |                                                                                                             | Other Database Import                                    |
| A/duck/Vietnam/OIE-3287/2011(H3N6)                  |          | 2011-10-05      |                           |                           |                          |                          |                          | EPI371576                |                          |                          |                                                                                                             | Other Database Import                                    |
| A/Eurasian wigeon/Mongolia/340V/2009(H4N6)          |          | 2009-08-14      |                           |                           |                          |                          |                          | EPI485322                |                          |                          |                                                                                                             | Other Database Import                                    |
| A/Khaki_Campbell_duck/Karachi/NARC-23963/2010(H4N6) |          | 2010-12-09      |                           |                           |                          |                          |                          | EPI407862                |                          |                          |                                                                                                             | Other Database Import                                    |
| A/mallard/Czech Republic/12652/2007(H4N6)           |          | 2007-08-06      |                           |                           |                          |                          |                          | EPI284397                |                          |                          |                                                                                                             | Other Database Import                                    |
| A/mallard_duck/Netherlands/10/2013(H4N6)            |          | 2013-12-04      |                           |                           |                          |                          |                          | EPI1013677               |                          |                          |                                                                                                             | Other Database Import                                    |
| A/mallard_duck/Netherlands/19/2012(H4N6)            |          | 2012-09-07      |                           |                           |                          |                          |                          | EPI890326                |                          |                          |                                                                                                             | Other Database Import                                    |
| A/mallard_duck/Netherlands/22/2011(H4N6)            |          | 2011-09-30      |                           |                           |                          |                          |                          | EPI1011235               |                          |                          |                                                                                                             | Other Database Import                                    |
| A/mallard_duck/Netherlands/27/2009(H4N6)            |          | 2009-12-21      |                           |                           |                          |                          |                          | EPI889824                |                          |                          |                                                                                                             | Other Database Import                                    |
| A/mallard_duck/Netherlands/30/2014(H4N6)            |          | 2014-07-21      |                           |                           |                          |                          |                          | EPI891032                |                          |                          |                                                                                                             | Other Database Import                                    |
| A/mallard_duck/Netherlands/6/2006(H4N6)             |          | 2006-06-03      |                           |                           |                          |                          |                          | EPI890683                |                          |                          |                                                                                                             | Other Database Import                                    |
| A/mallard_duck/Netherlands/7/2006(H10N6)            |          | 2006-06-05      |                           |                           |                          |                          |                          | EPI1014700               |                          |                          |                                                                                                             | Other Database Import                                    |
| A/mallard/Iceland/1007/2011(H3N6)                   |          | 2011-10-14      |                           |                           |                          |                          |                          | EPI475927                |                          |                          |                                                                                                             | Other Database Import                                    |
| A/mallard/Sweden/105516/2009(H4N6)                  |          | 2009-12-02      |                           |                           |                          |                          |                          | EPI513184                |                          |                          |                                                                                                             | Other Database Import                                    |
| A/mallard/Sweden/124228/2010(H4N6)                  |          | 2010-11-01      |                           |                           |                          |                          |                          | EPI513191                |                          |                          |                                                                                                             | Other Database Import                                    |
| A/mallard/Sweden/93475/2009(H10N6)                  |          | 2009-08-23      |                           |                           |                          |                          |                          | EPI618783                |                          |                          |                                                                                                             | Other Database Import                                    |
| A/ruddy_shelduck/Mongolia/592/2010(H8N6)            |          | 2010-06-22      |                           |                           |                          |                          |                          | EPI485357                |                          |                          |                                                                                                             | Other Database Import                                    |
| A/shoveller/Chany Lake/101/2012(H4N6)               |          | 2012-08-26      |                           |                           |                          |                          |                          | EPI823790                |                          |                          | Research Institute of Experimental and Clinical Medicine                                                    | Research Institute of Experimental and Clinical Medicine |
| A/teal/Chany Lake/104_cloaca/2012(H4N6)             |          | 2012-08-26      |                           |                           |                          |                          |                          | EPI823909                |                          |                          | Research Institute of Experimental and Clinical Medicine                                                    | Research Institute of Experimental and Clinical Medicine |
| A/teal/Egypt/09888-NAMRU3/2005(H4N6)                |          | 2005-10-03      |                           |                           |                          |                          |                          | EPI372354                |                          |                          | U.S. Naval Medical Research Unit No.3                                                                       | Centers for Disease Control and Prevention               |
| A/chicken/Jiangxi/1227/2014(H10N6)                  |          | 2014-03-16      |                           |                           |                          |                          |                          | EPI600192                |                          |                          |                                                                                                             | Other Database Import                                    |
| A/chicken/Shenzhen/552/2013(H5N6)                   |          | 2013-12-10      |                           |                           |                          |                          |                          | EPI599294                |                          |                          |                                                                                                             | Other Database Import                                    |
| A/duck/Dongguan/3069/2013(H5N6)                     |          | 2013-12-18      |                           |                           |                          |                          |                          | EPI599341                |                          |                          |                                                                                                             | Other Database Import                                    |
| A/silkie_chicken/Dongguan/2809/2013(H5N6)           |          | 2013-12-18      |                           |                           |                          |                          |                          | EPI599335                |                          |                          |                                                                                                             | Other Database Import                                    |
| A/goose/Shantou/1763/2014(H5N6)                     |          | 2014-03-13      |                           |                           |                          |                          |                          | EPI599650                |                          |                          |                                                                                                             | Other Database Import                                    |
| A/duck/Guangdong/GD01/2014(H5N6)                    |          | 2014-03-01      |                           |                           |                          |                          |                          | EPI531458                |                          |                          |                                                                                                             | Other Database Import                                    |
| A/duck/Guangzhou/18/2014(H5N6)                      |          | 2014-01-15      |                           |                           |                          |                          |                          | EPI775285                |                          |                          |                                                                                                             | Other Database Import                                    |
| A/duck/Vietnam/LBM758/2014(H5N6)                    |          | 2014-10-13      |                           |                           |                          |                          |                          | EPI596612                |                          |                          |                                                                                                             | Other Database Import                                    |
| A/chicken/Jiangxi/NCDZT1123/2014(H5N6)              |          | 2014-06-29      |                           |                           |                          |                          |                          | EPI590808                |                          |                          |                                                                                                             | Other Database Import                                    |

Supplementary Table 1. Continued

| Virus name                                        | Genotype | Collection date | GISAI D PB2<br>accession No. | GISAI D PB1<br>accession No. | GISAI D PA<br>accession No. | GISAI D HA<br>accession No. | GISAI D NP<br>accession No. | GISAI D NA<br>accession No. | GISAI D MP<br>accession No. | GISAI D NS<br>accession No.                     | GISAI D originating<br>laboratory (where given) | GISAI D submitting<br>laboratory                |
|---------------------------------------------------|----------|-----------------|------------------------------|------------------------------|-----------------------------|-----------------------------|-----------------------------|-----------------------------|-----------------------------|-------------------------------------------------|-------------------------------------------------|-------------------------------------------------|
| A/Yunnan/0127/2015<br>(H5N6)                      |          | 2015-02-06      |                              |                              |                             |                             |                             | EPI641400                   |                             |                                                 |                                                 | Other Database Import                           |
| A/Guangzhou/39715/2<br>014(H5N6)                  |          | 2014-12-11      |                              |                              |                             |                             |                             | EPI593891                   |                             |                                                 |                                                 | Other Database Import                           |
| A/environment/Guangdong/GZ670/2015<br>(H5N6)      |          | 2015-05-04      |                              |                              |                             |                             |                             | EPI758872                   |                             |                                                 |                                                 | Other Database Import                           |
| A/duck/Shantou/6233/2<br>004(H5N6)                |          | 2004-01-01      |                              |                              |                             |                             |                             | EPI268294                   |                             |                                                 |                                                 | Other Database Import                           |
| A/mallard/Shantou/972/<br>2005(H5N6)              |          | 2005-01-01      |                              |                              |                             |                             |                             | EPI268294                   |                             |                                                 |                                                 | Other Database Import                           |
| A/duck/Fujian/2087/20<br>07(H5N6)                 |          | 2007-01-01      |                              |                              |                             |                             |                             | EPI365123                   |                             |                                                 |                                                 | Other Database Import                           |
| A/chicken/Hunan/S449<br>5/2010(H5N6)              |          | 2010-12-10      |                              |                              |                             |                             |                             | EPI1007216                  |                             |                                                 |                                                 | Other Database Import                           |
| A/duck/Jiangxi/10160/2<br>014(H5N6)               |          | 2014-02-17      |                              |                              |                             |                             |                             | EPI599355                   |                             |                                                 |                                                 | Other Database Import                           |
| A/chicken/Shenzhen/18<br>45/2013(H5N6)            |          | 2013-12-12      |                              |                              |                             |                             |                             | EPI599308                   |                             |                                                 |                                                 | Other Database Import                           |
| A/environment/Zhenjiang/C13/2013<br>(H5N6)        |          | 2013-12-20      |                              |                              |                             |                             |                             | EPI547404                   |                             |                                                 |                                                 | Other Database Import                           |
| A/chicken/Sichuan/NCJ<br>PL1/2014(H5N6)           |          | 2014-04-27      |                              |                              |                             |                             |                             | EPI590863                   |                             |                                                 |                                                 | Other Database Import                           |
| A/chicken/Gifu/1-1T/20<br>17(H5N6)                |          | 2017-01-14      |                              |                              |                             |                             |                             | EPI885283                   |                             |                                                 |                                                 | National Institute of<br>Animal Health          |
| A/chicken/Miyazaki/2-2<br>C/2017(H5N6)            |          | 2017-01-24      |                              |                              |                             |                             |                             | EPI891534                   |                             |                                                 |                                                 | National Institute of<br>Animal Health          |
| A/muscovy duck/Aomori/1-3T/2016(H5N6)             |          | 2016-11-28      |                              |                              |                             |                             |                             | EPI867088                   |                             | National Institute of<br>Animal Health          |                                                 | National Institute of<br>Animal Health          |
| A/chicken/Kumamoto/1-<br>2C/2016(H5N6)            |          | 2016-12-27      |                              |                              |                             |                             |                             | EPI881068                   |                             |                                                 |                                                 | National Institute of<br>Animal Health          |
| A/chicken/Korea/HN1/<br>2016(H5N6)                |          | 2016-11-16      |                              |                              |                             |                             |                             | EPI866087                   |                             | Animal and Plant<br>Quarantine Agency<br>(APQA) |                                                 | Animal and Plant<br>Quarantine Agency<br>(APQA) |
| A/duck/Korea/ES2/2016<br>(H5N6)                   |          | 2016-11-16      |                              |                              |                             |                             |                             | EPI866095                   |                             | Animal and Plant<br>Quarantine Agency<br>(APQA) |                                                 | Animal and Plant<br>Quarantine Agency<br>(APQA) |
| A/duck/Korea/H15/201<br>6(H5N6)                   |          | 2016-11-20      |                              |                              |                             |                             |                             | EPI866103                   |                             | Animal and Plant<br>Quarantine Agency<br>(APQA) |                                                 | Animal and Plant<br>Quarantine Agency<br>(APQA) |
| A/Eurasian eagle owl/<br>Korea/960/2016<br>(H5N6) |          | 2016-11-05      |                              |                              |                             |                             |                             | EPI866116                   |                             | Animal and Plant<br>Quarantine Agency<br>(APQA) |                                                 | Animal and Plant<br>Quarantine Agency<br>(APQA) |
| A/mandarin duck/Korea/<br>WB246/2016<br>(H5N6)    |          | 2016-11-17      |                              |                              |                             |                             |                             | EPI866134                   |                             | Animal and Plant<br>Quarantine Agency<br>(APQA) |                                                 | Animal and Plant<br>Quarantine Agency<br>(APQA) |
| A/spot billed duck/Korea/<br>WB141/2016<br>(H5N6) |          | 2016-11-10      |                              |                              |                             |                             |                             | EPI866146                   |                             | Animal and Plant<br>Quarantine Agency<br>(APQA) |                                                 | Animal and Plant<br>Quarantine Agency<br>(APQA) |
