# Supplementary material for: Novel reassortants of clade 2.3.4.4 H5N6 highly pathogenic avian influenza viruses possessing genetic heterogeneity in South Korea in late 2017
Source: PubMed Central journal article supplement — J Vet Sci. 2018 Nov 28;19(6):850–4. doi: 10.4142/jvs.2018.19.6.850 (PMC6265581; doi:10.4142/jvs.2018.19.6.850), 2018-11-28
Supplement: jvs-19-850-s002.pdf [file jvs-19-850-s002.pdf]

**Supplementary Table 2.** Clade 2.3.4.4b H5N6 highly pathogenic avian influenza isolates used in this study

| Avian species |              | Virus name                             | Location                              | Age (wk)          | Clinical sign                                          |   |
|---------------|--------------|----------------------------------------|---------------------------------------|-------------------|--------------------------------------------------------|---|
| Domestic      | Broiler duck | A/duck/Korea/HD1/2017 (H5N6)           | 35°31'N, 126°42'E                     | 5                 | Lameness                                               |   |
|               | Breeder duck | A/duck/Korea/H35/2017 (H5N6)           | 34°54'N, 126°41'E                     | 39                | Reduced egg production, increasing mortality, lameness |   |
|               | Broiler duck | A/duck/Korea/H56/2017 (H5N6)           | 34°50'N, 126°35'E                     | 5                 | Not detected                                           |   |
|               | Broiler duck | A/duck/Korea/H70/2017 (H5N6)           | 35°40'N, 126°48'E                     | 5                 | Lameness                                               |   |
|               | Breeder duck | A/duck/Korea/H80/2017 (H5N6)           | 34°49'N, 126°40'E                     | 38                | Increasing mortality, reduced egg production           |   |
|               | Broiler duck | A/duck/Korea/H81/2017 (H5N6)           | 34°48'N, 127°20'E                     | 5                 | Increasing mortality                                   |   |
|               | Broiler duck | A/duck/Korea/H103/2017 (H5N6)          | 34°50'N, 126°35'E                     | 5                 | Increasing mortality                                   |   |
|               | Breeder duck | A/duck/Korea/H107/2017 (H5N6)          | 34°57'N, 126°35'E                     | 20                | Increasing mortality                                   |   |
|               | Wild         | Mallard                                | A/mallard/Korea/Jeju-H24/2017 (H5N6)  | 33°30'N, 126°53'E | -                                                      | - |
|               |              | Mandarin duck                          | A/mandarin duck/Korea/H69/2017 (H5N6) | 36°44'N, 127°08'E | -                                                      | - |
| Mandarin duck |              | A/mandarin duck/Korea/H71/2017 (H5N6)  | 36°45'N, 127°06'E                     | -                 | -                                                      |   |
| Mandarin duck |              | A/mandarin duck/Korea/H119/2017 (H5N6) | 36°44'N, 127°07'E                     | -                 | -                                                      |   |
